# Supplementary material for: Structural dependency of collagen fibers on ion types revealed by in situ second harmonic generation (SHG) imaging method
Source: Royal Society of Chemistry journal article supplement (doi:10.1039/c4ay02242d), 2014-11-19

Supplementary Information Page S-1

Prof. Julia G. Lyubovitsky  
239 Material Science and Engineering (MSE)  
Department of Bioengineering  
900 University Ave.  
Riverside, CA 92521  
Phone (951) 827-7231  
Email [julial@ucr.edu](mailto:julial@ucr.edu)

Xuye Lang  
A110 Bourns Hall  
Department of Biochemistry  
900 University Ave.  
Riverside, CA 92521  
Phone (951) 827-7231  
Email [clang001@ucr.edu](mailto:clang001@ucr.edu)

**Title: “Structural dependency of collagen fibers on ion types revealed by *in situ* second harmonic generation (SHG) imaging method”**

**Materials:** Supplementary Figure S1 (Supplementary Information Page S-2) shows the solubility of collagen in samples prepared under **37 °C** and different concentrations of phosphate. Supplementary Figure S2 (Supplementary Information Page S-3) shows additional backscattered second harmonic generation (SHG) images from collagen materials assembled at pH 7.4, 37 °C and 40 mM, 50 mM, 80 mM, 100 mM, 120 mM, 140 mM, 180 mM, 300 mM and 500 mM phosphate concentrations. Supplementary Figure S3 (Supplementary Information Page S-4) shows backscattered second harmonic generation (SHG) images from collagen materials assembled at pH 7.4, 4 g/l collagen solid content, room temperature as well as 37 °C and different sodium chloride concentrations. Supplementary Figure S4 (Supplementary Information Page S-4) shows backscattered second harmonic generation (SHG) images from collagen materials assembled at pH 7.4, 27 °C, different sodium chloride concentrations and quantification of the collagen hydrogel parameters.

**Figure S1.**

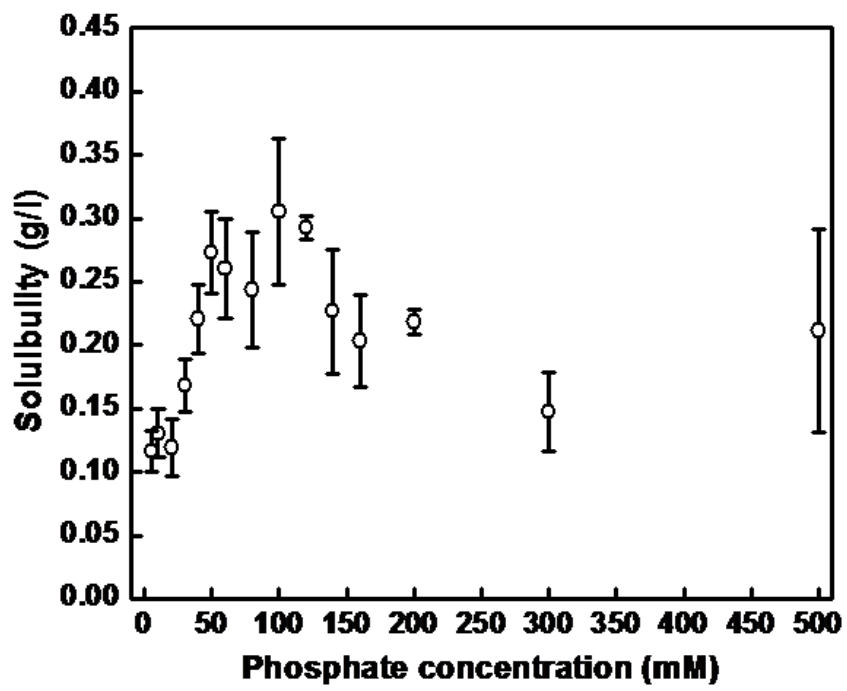

**Figure S2.**

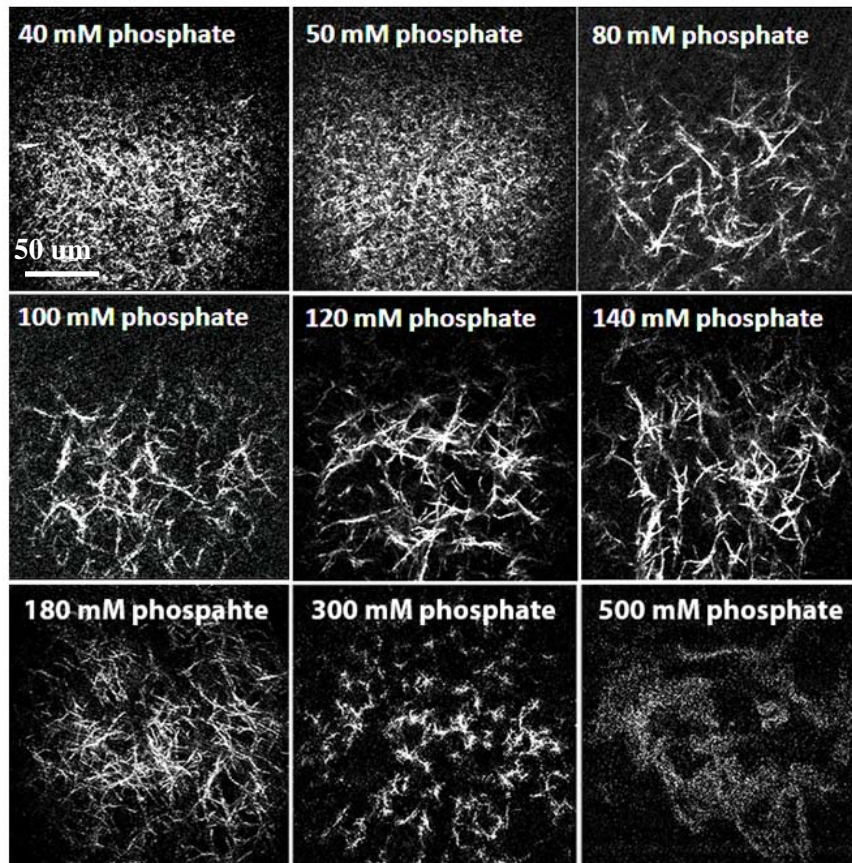

Figure S3.

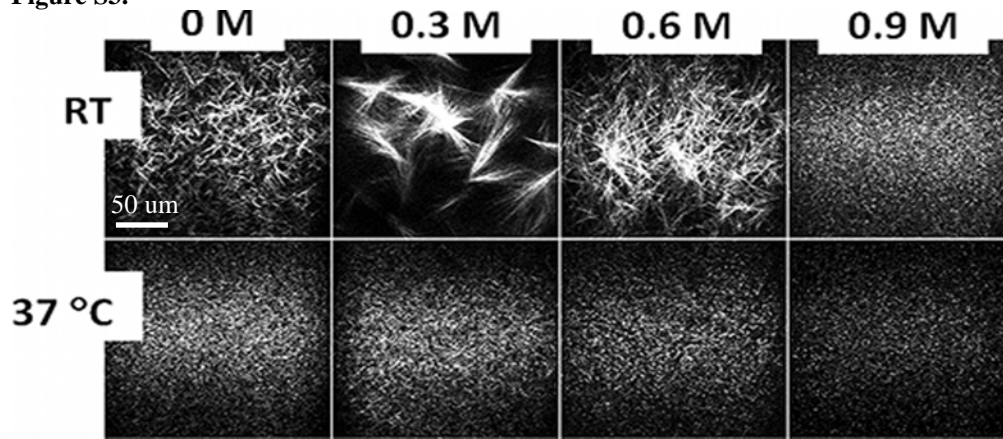

Figure S4.

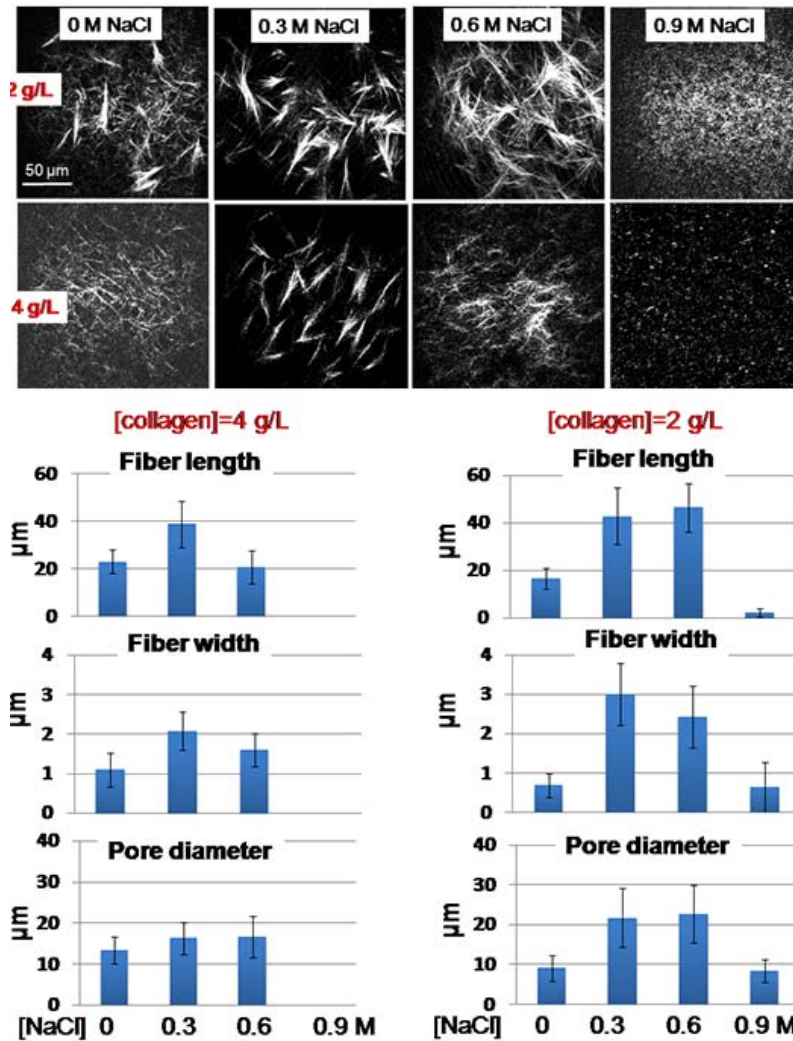

Supplement: c4ay02242d1.pdf [file c4ay02242d1.pdf]
